# Supplementary material for: Antarctica’s Protected Areas Are Inadequate, Unrepresentative, and at Risk
Source: PLOS journal article supplement (doi:10.1371/journal.pbio.1001888), 2014-06-17

**Figure S2. Continent-wide risk of establishment of nonindigenous species and high-risk ASPAs.** (See Chown et al. [25] for details of risk index). Inset shows location of ASPAs overlaid on risk index cells with values  $>0$  for the Antarctic Peninsula region.

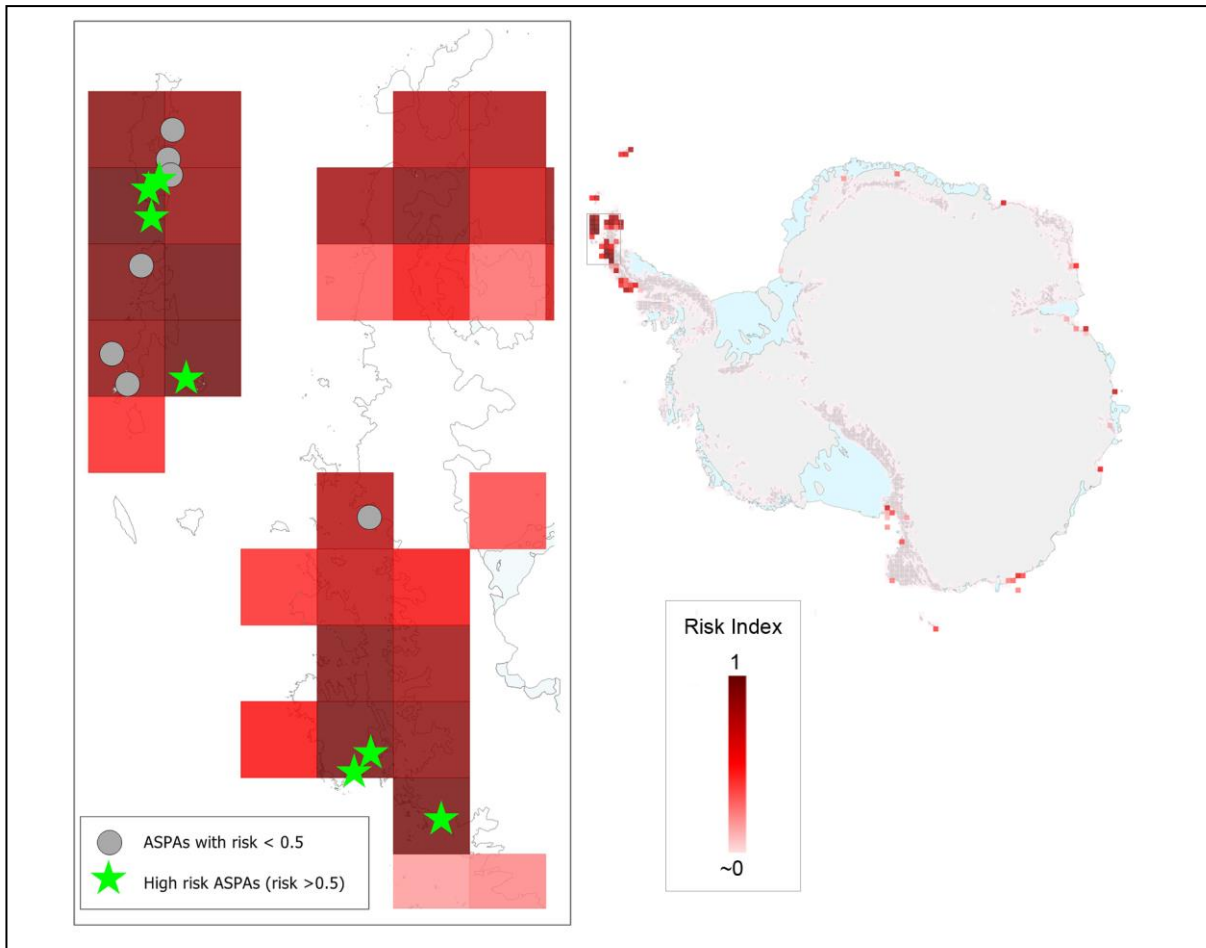

Supplement: S2 (10.1371/journal.pbio.1001888.s002) [file journal.pbio.1001888.s002]
